# Supplementary material for: The object-specific flood damage database HOWAS21
Source: Copernicus journal article supplement (doi:10.5194/nhess-2019-420), 2020-01-21
Supplement: Supplementary file 1 [file nhess-2019-420-supplement.pdf]

**Table S1.** Examples of natural hazard damage databases providing information on flood impacts. This list of databases is not exhaustive.

| Database                   | Holder institution                                                                           | Scope                                                                     | Scale                         | Temporal coverage | Recording thresholds                                                                                                              | Data sources                                                                                                                   | Accessibility    | Description / reference | URL                                                                                                                                             |
|----------------------------|----------------------------------------------------------------------------------------------|---------------------------------------------------------------------------|-------------------------------|-------------------|-----------------------------------------------------------------------------------------------------------------------------------|--------------------------------------------------------------------------------------------------------------------------------|------------------|-------------------------|-------------------------------------------------------------------------------------------------------------------------------------------------|
| AJDA                       | Administration of the Republic of Slovenia for Civil Protection and Disasters Relief (ACPDR) | National (Slovenia)                                                       | National, regional, municipal | 2003 - present    | Incorporation of damage to crops and property when the level of damage exceeds 0.03% of the national budget                       | Civil protection offices, environmental agencies, scientific institutions, auditors, insurance companies                       | No public access | Rudari et al., 2017     | -                                                                                                                                               |
| ADRC                       | Asian Disaster Reduction Center (ADRC)                                                       | Continental (Asia)                                                        | National, regional, municipal | 1998 – present    | Not defined                                                                                                                       | UN agencies, Reuters and international news agencies (AFP, BBC, CNN), NGOs (IFRC, Catholic Relief Services)                    | Open access      | Tschoegl et al., 2006   | <a href="http://www.adrc.asia/latest_disaster.php">http://www.adrc.asia/latest_disaster.php</a>                                                 |
| Canadian Disaster Database | Office of Critical Infrastructure Protection and Emergency Preparedness (OCIPEP)             | National (Canada + global regions, where Canadian citizens were involved) | National, regional, municipal | 1900 – present    | >10 fatalities, >100 people affected, declaration of state of emergency, historical significance, significant damage/interruption | Press media, government, provincial emergency management organizations, municipal government, Insurance Bureau of Canada, NGOs | Open access      | Tschoegl et al., 2006   | <a href="http://cdd.publicsafety.gc.ca/srchpg-eng.aspx?dynamic=false">http://cdd.publicsafety.gc.ca/srchpg-eng.aspx?dynamic=false</a>           |
| DesInventar                | United Nations Office for Disaster Risk Reduction (UNISDR)                                   | Global                                                                    | National                      | 1994 - present    | Casualties or damage                                                                                                              | NGOs, governmental institutions, civil protection agencies                                                                     | Open access      | Rudari et al., 2017     | <a href="https://www.desinventar.net/DesInventar/main.jsp?countrycode=g15">https://www.desinventar.net/DesInventar/main.jsp?countrycode=g15</a> |

**Table S1.** Examples of natural hazard damage databases providing information on flood impacts (continuation). This list of databases is not exhaustive

| Database                                            | Holder institution                                                             | Scope                  | Scale                     | Temporal coverage | Recording thresholds                                                                                                | Data sources                                                                                                                                                          | Accessibility       | Description / reference                | URL                                                                                                                                           |
|-----------------------------------------------------|--------------------------------------------------------------------------------|------------------------|---------------------------|-------------------|---------------------------------------------------------------------------------------------------------------------|-----------------------------------------------------------------------------------------------------------------------------------------------------------------------|---------------------|----------------------------------------|-----------------------------------------------------------------------------------------------------------------------------------------------|
| DSWD-DROMIC                                         | Department of Social Welfare and Development (DSWD), Government of Philippines | National (Philippines) | Regional, municipal, city | 2006 - present    | Not defined                                                                                                         | DSWD field offices, NGOs, media                                                                                                                                       | Open access         | Tschoegl et al., 2006                  | <a href="https://dromic.dswd.gov.ph/">https://dromic.dswd.gov.ph/</a>                                                                         |
| EMA Disasters Database                              | Emergency Management Australia, Australian government                          | National (Australia)   | Administrative regions    | 1622 – present    | ≥ 3 fatalities, 20 injured or ill and/or significant damage to property, infrastructure, agriculture or environment | Government, Insurance Council of Australia, emergency service agencies, research bodies, educational institutions, press media                                        | Open access         | Tschoegl et al., 2006                  | <a href="https://knowledge.idr.org.au/collectio/ns/australian-disasters/">https://knowledge.idr.org.au/collectio/ns/australian-disasters/</a> |
| EM-DAT                                              | CRED, Université Catholique de Louvain, Brussels                               | Global                 | National                  | 1900 – present    | >10 fatalities, >100 people affected, declaration of state of emergency                                             | UN agencies, government organizations, Red Cross and Red Crescent Societies                                                                                           | Open access         | Kron et al., 2012; Rudari et al., 2017 | <a href="https://www.emdat.be/">https://www.emdat.be/</a>                                                                                     |
| Flood Hazard Research Centre (FHRC) damage database | Flood Hazard Research Centre (FHRC), Middlesex University, UK                  | National               | Single element at risk    | 1977 - present    | Not defined                                                                                                         | Mainly synthetic data generated by expert judgement; But also empirical data collected from: on-site expert surveys, insurance companies, government, other databases | Access upon payment | Penning-Rowsell et al., 2013           | -                                                                                                                                             |

**Table S1.** Examples of natural hazard damage databases providing information on flood impacts (continuation). This list of databases is not exhaustive

| Database                                                 | Holder institution                            | Scope                               | Scale                                      | Temporal coverage | Recording thresholds                                                                          | Data sources                                                   | Accessibility    | Description / reference                      | URL                                                                                                                             |
|----------------------------------------------------------|-----------------------------------------------|-------------------------------------|--------------------------------------------|-------------------|-----------------------------------------------------------------------------------------------|----------------------------------------------------------------|------------------|----------------------------------------------|---------------------------------------------------------------------------------------------------------------------------------|
| GLIDE                                                    | Asian Disaster Reduction Center (ADRC)        | Global                              | National, regional, municipal              | 1930 – present    | Not defined                                                                                   | Official organizations, partners, news, publications           | Open access      | Tschoegl et al., 2006; Rudari et al., 2017   | <a href="http://www.glidenuber.net">http://www.glidenuber.net</a>                                                               |
| Global Active Archive of Large Flood Events              | Dartmouth Flood Observatory                   | Global                              | States, provinces, counties, towns, cities | 1985 – present    | Large floods                                                                                  | News, government, instrumental, remote sensing                 | Open Access      | Bubeck and Kreibich, 2011; Brakenridge, 2017 | <a href="http://floodobservatory.colorado.edu/Archives/index.html">http://floodobservatory.colorado.edu/Archives/index.html</a> |
| HANZE - Historical Analysis of Natural Hazards in Europe | TU Delft, Department of Hydraulic Engineering | Continental (Europe)                | Regional (NUTS3)                           | 1870 – 2016       | Available statistics on either area flooded, fatalities, persons affected, or monetary damage | Publications and databases                                     | Open access      | Paprotny et al., 2018                        | <a href="https://data.4tu.nl/repository/collection:HANZE">https://data.4tu.nl/repository/collection:HANZE</a>                   |
| MANDISA Database                                         | University of Cape Town (DiMP)                | Local (Cape Town Metropolitan Area) | Single element at risk                     | 1990 - 2004       | Large-, medium-, and small-sized disasters and incidents                                      | Reports from fire services, disaster management agencies, NGOs | No public access | Tschoegl et al., 2006                        | -                                                                                                                               |

**Table S1.** Examples of natural hazard damage databases providing information on flood impacts (continuation). This list of databases is not exhaustive.

| Database                   | Holder institution                            | Scope                               | Scale                  | Temporal coverage | Recording thresholds                                         | Data sources                                                                                                                                                  | Accessibility                                                                               | Description / reference                     | URL                                                                                               |
|----------------------------|-----------------------------------------------|-------------------------------------|------------------------|-------------------|--------------------------------------------------------------|---------------------------------------------------------------------------------------------------------------------------------------------------------------|---------------------------------------------------------------------------------------------|---------------------------------------------|---------------------------------------------------------------------------------------------------|
| NatCatSERVICE              | Munich RE                                     | Global                              | National               | 1974 – present    | Property damage and/or person affected                       | Lloyd’s, Reuters, reports from clients and branch offices, insurance press                                                                                    | Limited access to public (maps, reports, predefined analyses), extended services to clients | Kron et al., 2012; Rudari et al., 2017      | <a href="https://natcatservice.munichre.com/">https://natcatservice.munichre.com/</a>             |
| National Hazard Statistics | National Weather Service (NOAA), USA          | National                            | States                 | 1995 – present    | Information about fatalities, injuries and/or damages        | NOAA’s Storm Data reports                                                                                                                                     | Open access                                                                                 | Tschoegl et al., 2006                       | <a href="http://www.nws.noaa.gov/om/hazstats.shtml">http://www.nws.noaa.gov/om/hazstats.shtml</a> |
| NDCC Database              | National Disaster Coordination Council (NDCC) | National (Philippines)              | Regional               | 1990 – present    | Not defined                                                  | Office of Civil Defense, Office of Social Welfare, local planning development offices, local emergency management offices                                     | Open access                                                                                 | Tschoegl et al., 2006                       | <a href="http://ndrrmc.gov.ph/">http://ndrrmc.gov.ph/</a>                                         |
| ÖBB damage database        | Austrian Federal Railways (ÖBB)               | National (Austria)                  | Single element at risk | 2000 - present    | Railway operation incident, damage to railway infrastructure | ÖBB Natural Hazards Management Department                                                                                                                     | No public access                                                                            | Moran et al., 2010; Kellermann et al., 2016 | -                                                                                                 |
| SHELDUS                    | University of South Carolina, USA             | National (United States of America) | County, State          | 1960 – present    | Fatalities and/or monetary loss                              | National Climatic Data Center, National Center on Environmental Information, United States Geological Survey, US Census Bureau, US Bureau of Labor Statistics | Open access by subscription                                                                 | Rudari et al., 2017; CEMHS, 2018            | <a href="https://cemhs.asu.edu/sheldus/">https://cemhs.asu.edu/sheldus/</a>                       |

**Table S1.** Examples of natural hazard damage databases providing information on flood impacts (continuation). This list of databases is not exhaustive

| Database                                                 | Holder institution                            | Scope                               | Scale                                      | Temporal coverage | Recording thresholds                                                                          | Data sources                                                   | Accessibility    | Description / reference                      | URL                                                                                                                                       |
|----------------------------------------------------------|-----------------------------------------------|-------------------------------------|--------------------------------------------|-------------------|-----------------------------------------------------------------------------------------------|----------------------------------------------------------------|------------------|----------------------------------------------|-------------------------------------------------------------------------------------------------------------------------------------------|
| GLIDE                                                    | Asian Disaster Reduction Center (ADRC)        | Global                              | National, regional, municipal              | 1930 – present    | Not defined                                                                                   | Official organizations, partners, news, publications           | Open access      | Tschoegl et al., 2006; Rudari et al., 2017   | <a href="http://www.glidenumber.net">http://www.glidenu<br/>mber.net</a>                                                                  |
| Global Active Archive of Large Flood Events              | Dartmouth Flood Observatory                   | Global                              | States, provinces, counties, towns, cities | 1985 – present    | Large floods                                                                                  | News, government, instrumental, remote sensing                 | Open Access      | Bubeck and Kreibich, 2011; Brakenridge, 2017 | <a href="http://floodobservatory.colorado.edu/Archives/index.html">http://floodobservat<br/>ory.colorado.edu/A<br/>rchives/index.html</a> |
| HANZE - Historical Analysis of Natural Hazards in Europe | TU Delft, Department of Hydraulic Engineering | Continental (Europe)                | Regional (NUTS3)                           | 1870 – 2016       | Available statistics on either area flooded, fatalities, persons affected, or monetary damage | Publications and databases                                     | Open access      | Paprotny et al., 2018                        | <a href="https://data.4tu.nl/repository/collection:HANZE">https://data.4tu.nl/r<br/>epository/collection<br/>:HANZE</a>                   |
| MANDISA Database                                         | University of Cape Town (DiMP)                | Local (Cape Town Metropolitan Area) | Single element at risk                     | 1990 - 2004       | Large-, medium-, and small-sized disasters and incidents                                      | Reports from fire services, disaster management agencies, NGOs | No public access | Tschoegl et al., 2006                        | -                                                                                                                                         |
